# Supplementary material
Source: Research Square preprint supplement (doi:10.21203/rs.3.rs-9883455/v1)
Supplement: Supplementary file 1 [file 33858017b754a93d3dc8f983.docx]

Supporting information

**Cyclic Impregnation-Rapid Pyrolysis for Preparing Efficient and Durable Free-Standing Catalyst toward Oxygen and Chlorine Evolution**

Yingying Wang1#, Yanru Geng2#*, Huihui Liu2, Kunyan Sui1*, Xien Liu2*, Liqiang Hou2*,

1 College of Materials Science and Engineering, Qingdao University, Ningxia Road 308, Qingdao 266071,China

2 State Key Laboratory of Advanced Optical Polymer and Manufacturing Technology, College of Chemical Engineering, Qingdao University of Science and Technology, Qingdao 266042, China

E-mail: [gengyr2024@163.com](mailto:gengyr2024@163.com); [sky@qdu.edu.cn](mailto:sky@qdu.edu.cn); [liuxien@qust.edu.cn](mailto:liuxien@qust.edu.cn); houliqiang@qust.edu.cn

**Experimental Sections**

**Preparation of IrO2/TM:** Titanium mesh was first cut into appropriate sizes and etched in 6 M HCl at room temperature for 2 h to remove the surface oxide layer. It was then sequentially cleaned by ultrasonication in acetone, ethanol, and deionized water for 15 min each. A precursor solution was prepared by dissolving 50 mg of IrCl3·xH2O in 5 mL of isopropanol. The pretreated titanium mesh was dipped into the precursor solution, immediately transferred to a muffle furnace preheated to 400 °C, and heated for 5 min. After removal, the mesh was allowed to cool for 5 min. This dipping-heating-cooling cycle was repeated multiple times (optimized to five cycles). Finally, the mesh was annealed in the same furnace at 400 °C for 1 h and cooled to room temperature, yielding IrO2 nanoparticles anchored on titanium mesh (denoted as IrO2/TM).

**Preparation of C-IrO2/TM:** For comparison, a conventional coated electrode (C-IrO2/TM) was prepared by a drop-casting method. The catalyst ink was formulated by ultrasonically dispersing 2 mg of commercial IrO2 powder, 40 µL of Nafion solution (5 wt.%), and 300 µL of ethanol to form a homogeneous suspension. The ink was then drop-cast onto a pretreated titanium mesh and dried in air, yielding the C-IrO2/TM electrode.

**Materials Characterizations:**The catalyst's structural and morphological properties were systematically characterized through an integrated suite of advanced techniques: XRD on a Bruker D8 ADVANCE diffractometer (Cu Kα radiation, λ = 1.5418 Å); Morphology analysis via FE-SEM (Hitachi S-4800) and TEM (JEOL JEM-2100F); Surface chemistry by XPS (Thermo Scientific ESCALab250); Local atomic structure using EXAFS at PLS-II (quick-scanning XAS).

**Electrochemical measurements:**The catalyst's electrochemical performance was assessed on a CHI 760E workstation using a standard three-electrode setup at room temperature. IrO2/TM and C-IrO2/TM samples functioned directly as working electrodes, with Ag/AgCl and carbon rod serving as reference and counter electrodes, respectively. oxygen and chlorine evolution reactions (OER and CER) was evaluated by LSV in 0.1 M HClO4 and 4 M NaCl (pH = 2) solution, respectively, while EIS measurements were performed from 100 kHz to 0.1 Hz at potentials yielding 10 mA cm-2 current density.

**Electrochemical Surface Area (ECSA) Determination:** ECSA quantification was achieved by measuring double-layer capacitance through cyclic voltammetry. CV scans were conducted within a non-Faradaic potential window (1.12-1.21 V vs. RHE) at varying scan rates (20-120 mV s-1). The capacitive current (Δj/2) at 1.7 V vs. RHE was plotted against scan rate, with Cdl corresponding to the linear regression slope. This value was subsequently used to calculate ECSA according to the fundamental capacitance relationship:

ECSA = (A × Cdl)/Cs

where: A = geometric electrode area (cm2), Cs = specific capacitance (0.04 mF cm-2).

**
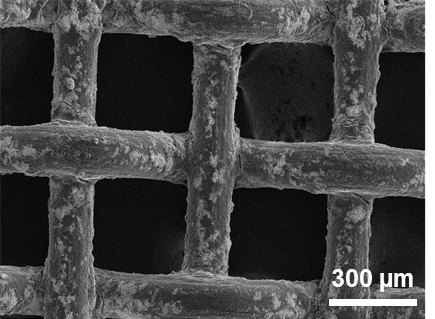
**

**Fig. S1**. SEM image of IrO2/TM.

**
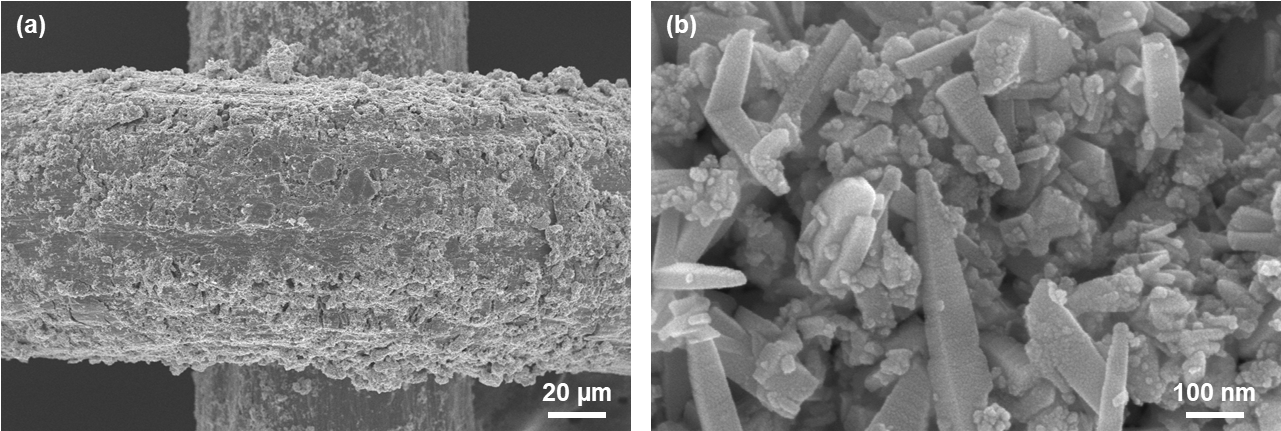
**

**Fig. S2**. SEM images of C-IrO2/TM.

**
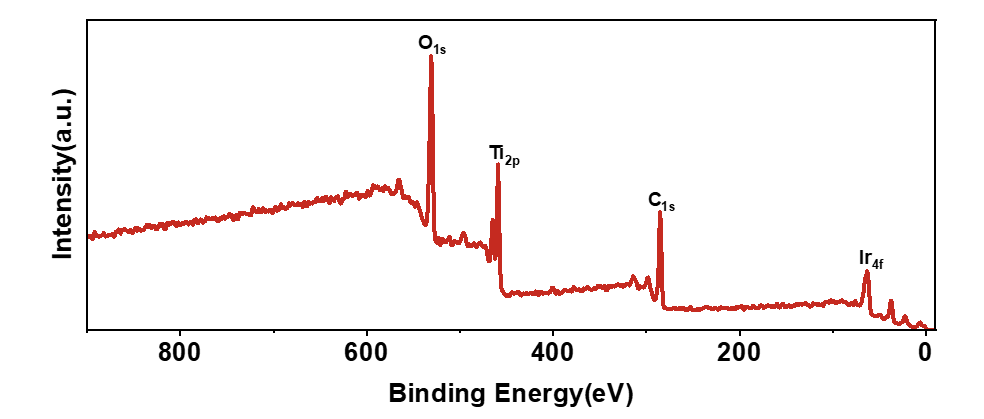
**

**Fig. S3**. XPS survey spectrum of IrO2/TM.


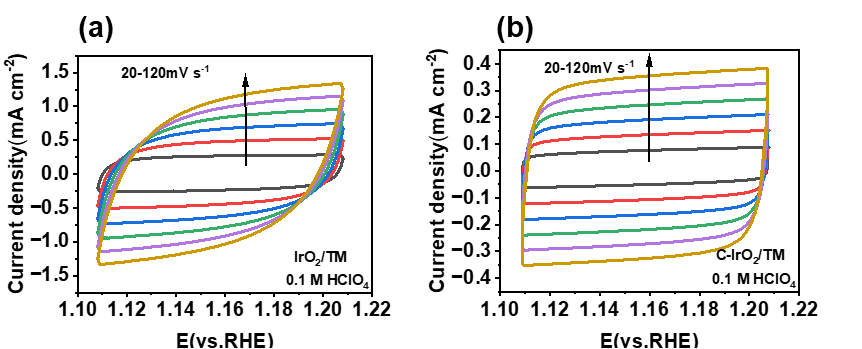


**Fig. S4**. CV curves of IrO2/TM and C-IrO2/TM at various scan rates..

**
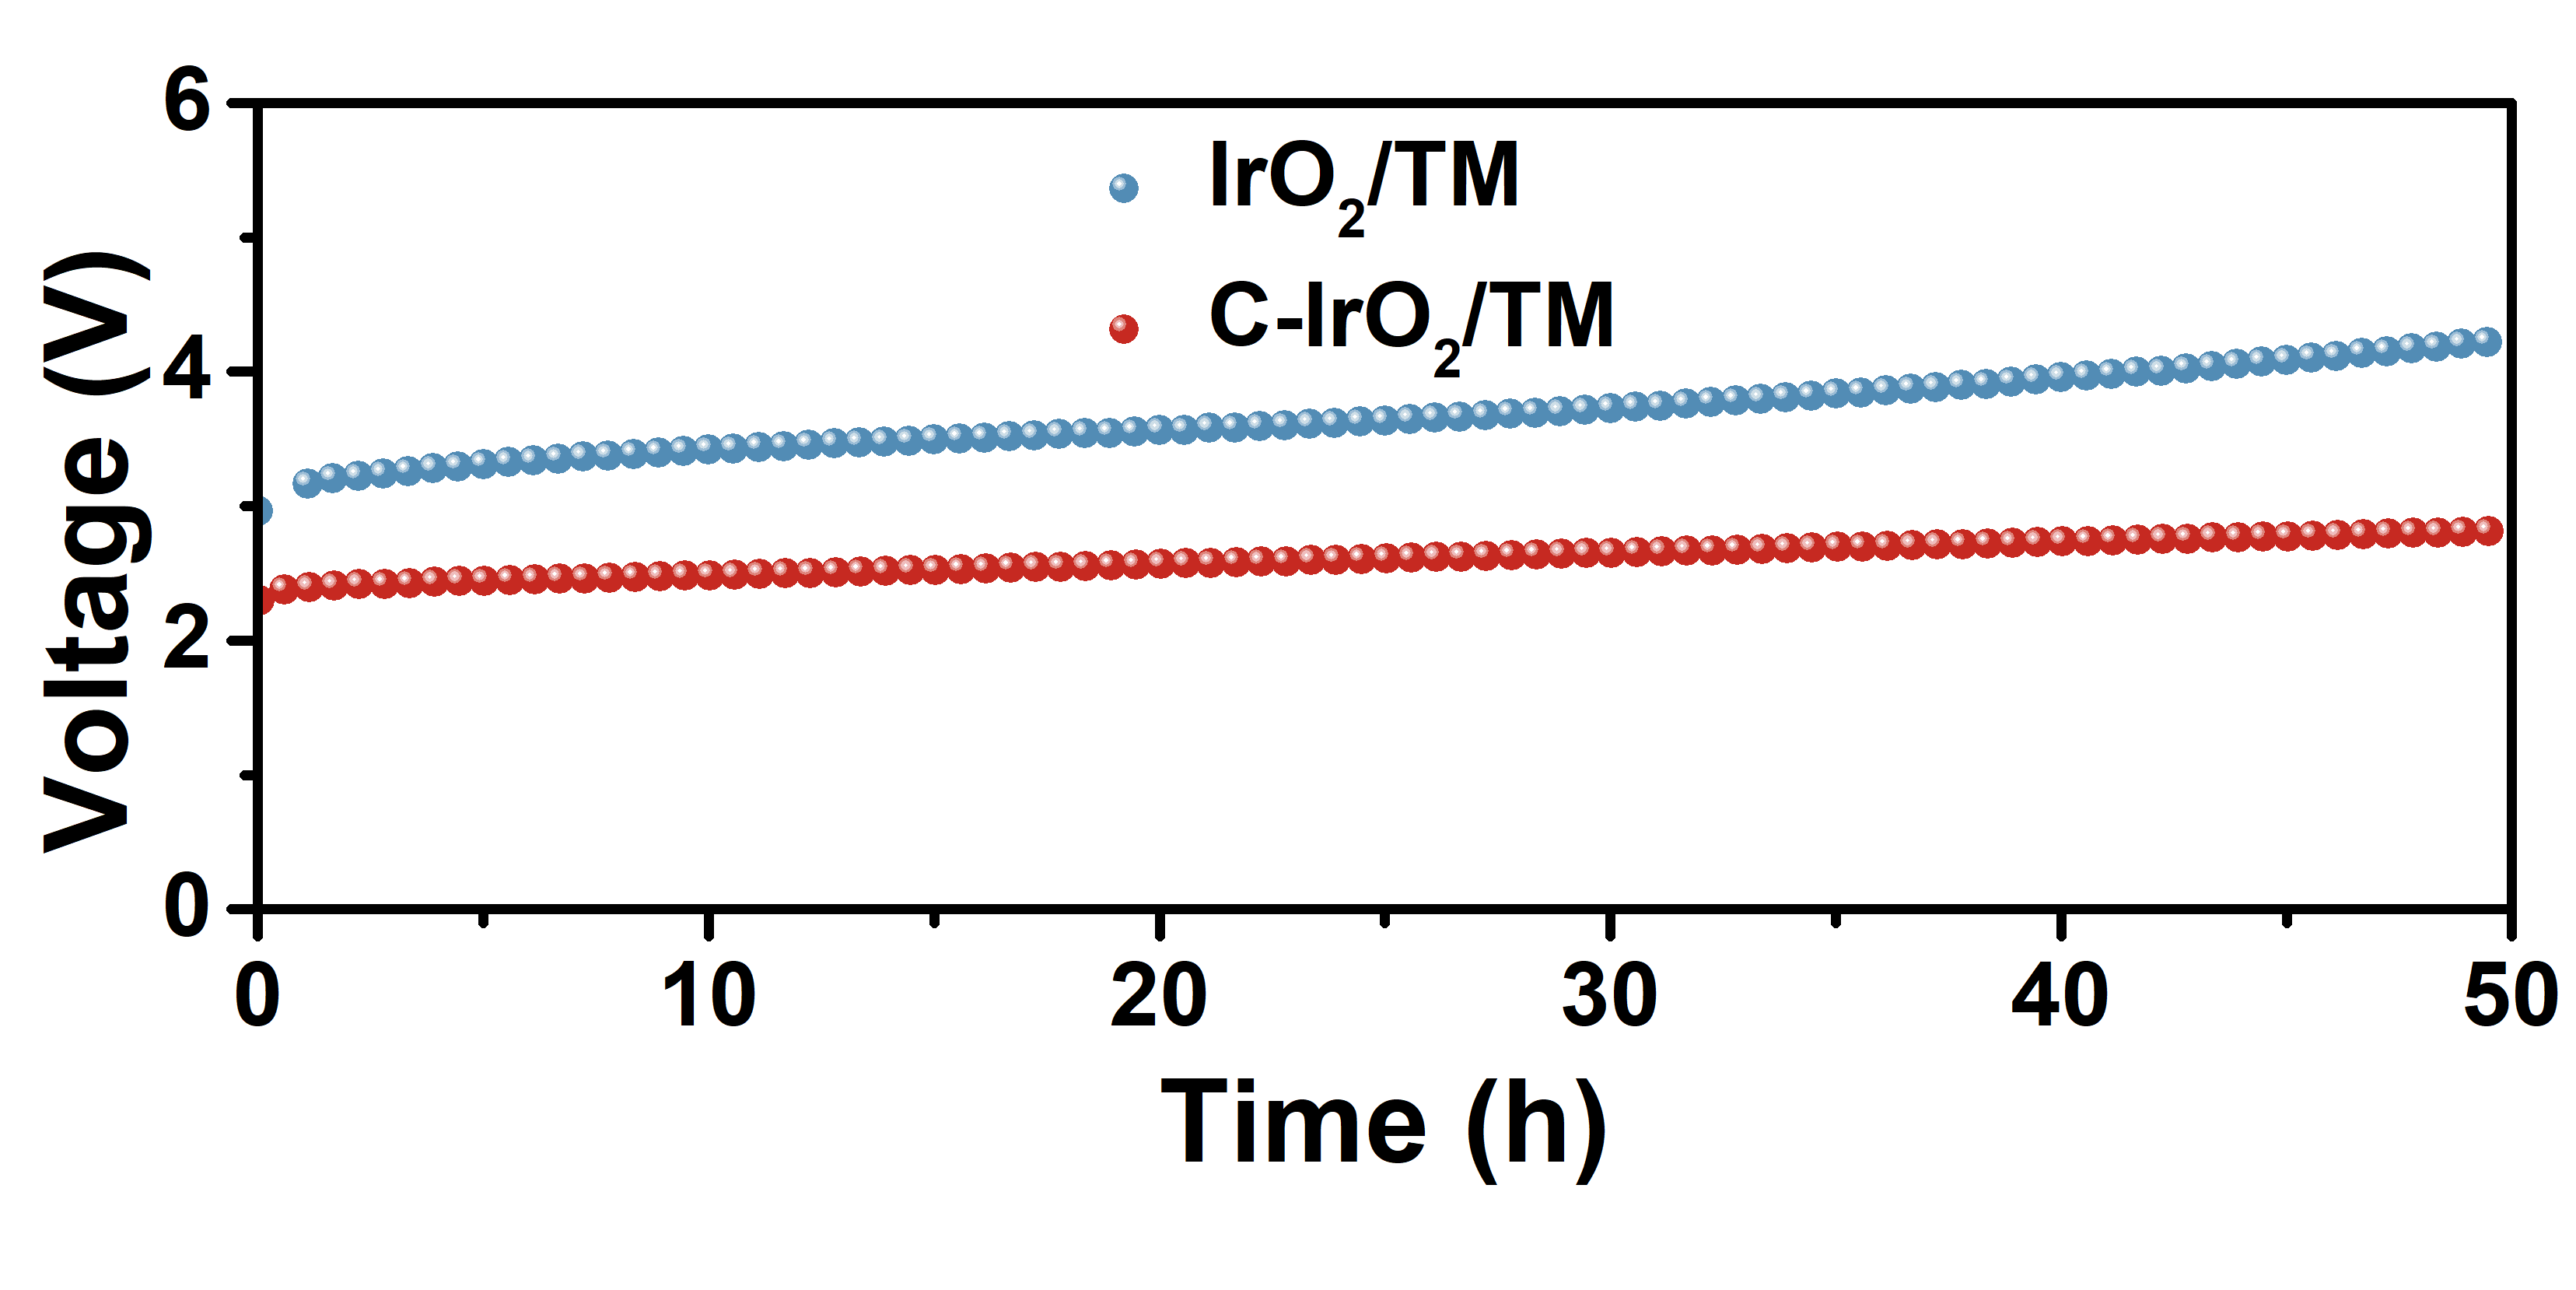
**

**Fig. S5**. Stability test of the corresponding AEM electrolyzer device at a constant current density.


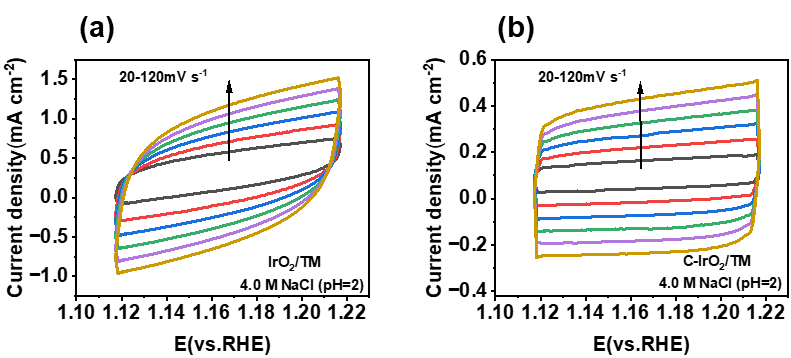


**Fig. S6**. CV curves of IrO2/TM and C-IrO2/TM at various scan rates under CER testing conditions.
