# Supplementary material
Source: Research Square preprint supplement (doi:10.21203/rs.3.rs-9883455/v1)
Supplement: Supplementary file 2 [file ff8de3dcbb80e8c371ab4c2c.docx]

**Supporting Information**

Supporting Information is available from the Wiley Online Library or from the author.
